# Supplementary material for: Dysregulated mitochondrial metabolism upon cigarette smoke exposure in various human bronchial epithelial cell models
Source: Oxford University Press journal article supplement (doi:10.1242/dmm.049247), 2022-03-01
Supplement: dmm049247supp.pdf [file dmm049247supp.pdf]

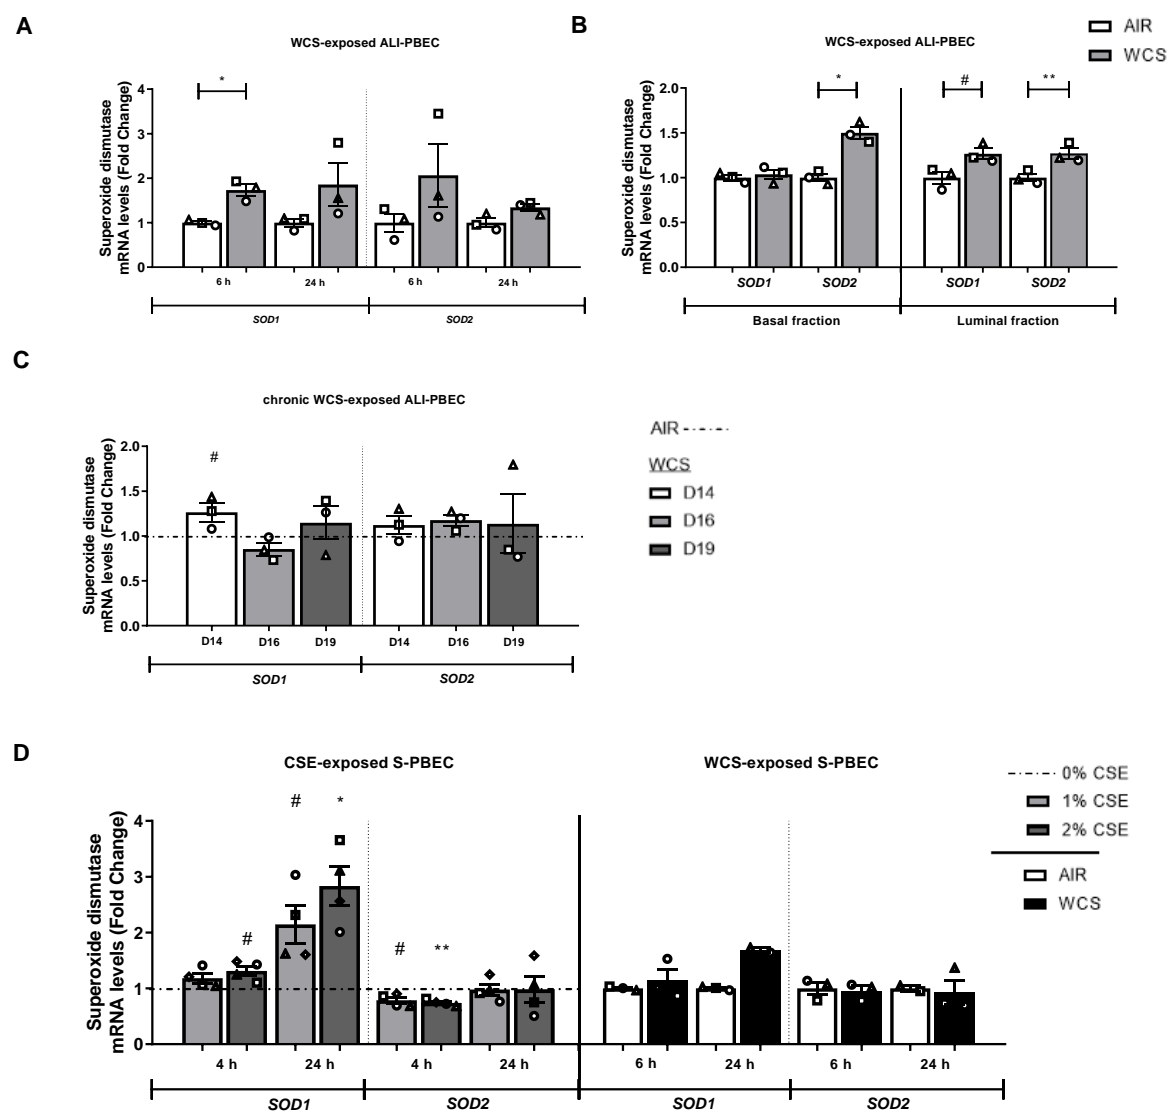

**Fig. S1. Increase in expression of genes involved in anti-oxidant response after CS exposure in both ALI-and S-PBEC.** After 2-weeks of differentiation, ALI-PBEC were exposed to fresh air or WCS from one 3R4F cigarette (University of Kentucky, 2 mg) and whole-cell lysates were harvested after 6h and 24 h, and the basal and luminal fractions were harvested only at 6 h post-exposure (n=3 donors/group). Gene expression of *SOD1* and *SOD2* in whole-cell lysates of ALI-PBEC (**A**) and separated fractions (**B**) were analyzed by real-time qPCR. ALI-PBEC were 1x daily exposed to fresh air or WCS from one 3R4F cigarette (University of Kentucky, 2 mg) during differentiation for 14 days followed by a cessation period up to 10 days. Cells were harvested on Day 14 (24 hours after the last WCS exposure), 16 and 19 (n=3 donors/group). mRNA levels of *SOD1* and *SOD2* (**C**) were analyzed in whole-cell lysates. Undifferentiated S-PBEC were treated with CSE from one 3R4F cigarette (University of Kentucky) diluted in HBSS (0-1-2%) in Lonza starvation medium for 4 h or 24 h (n=4 donors/group) or undifferentiated S-PBEC cultured on transwells were exposed, after removal of apical medium, to fresh air or WCS from one 3R4F cigarette (University of Kentucky, 2 mg) followed by harvesting of whole-cell lysates

after 6 h or 24 h recovery (n=2-3 donors/group). mRNA levels of *SOD1* and *SOD2* **(D)** were analyzed in whole-cell lysates. Data are presented as mean fold change compared to control (air, 0% CSE or WCS Day 14)  $\pm$  s.e.m.. Independent donors are represented by open circles, triangles, squares or diamonds. In case of the CSE-exposed S-PBEC experiments, the symbols reflect the mean of technical triplicates. Statistical differences between WCS versus air or WCS versus air after smoking cessation in ALI-PBEC on each day (e.g., WCS Day 14 versus air). were tested using a two-tailed paired parametric *t*-test. If comparison of various groups was required in case of the CSE exposure (CSE 1% or 2% versus 0% CSE) or in WCS chronic smoking cessation experiments (WCS Day 16, 19 versus WCS Day 14), an one-way ANOVA (matched/repeated measures) followed by Sidak's post-hoc test for multiple comparisons was conducted, and in case of missing values the mixed-effects models was performed. Statistical significance is indicated as <sup>#</sup>p<0.1, \*p<0.05 and \*\*p<0.01 compared to control (air, 0% CSE or WCS Day 14).

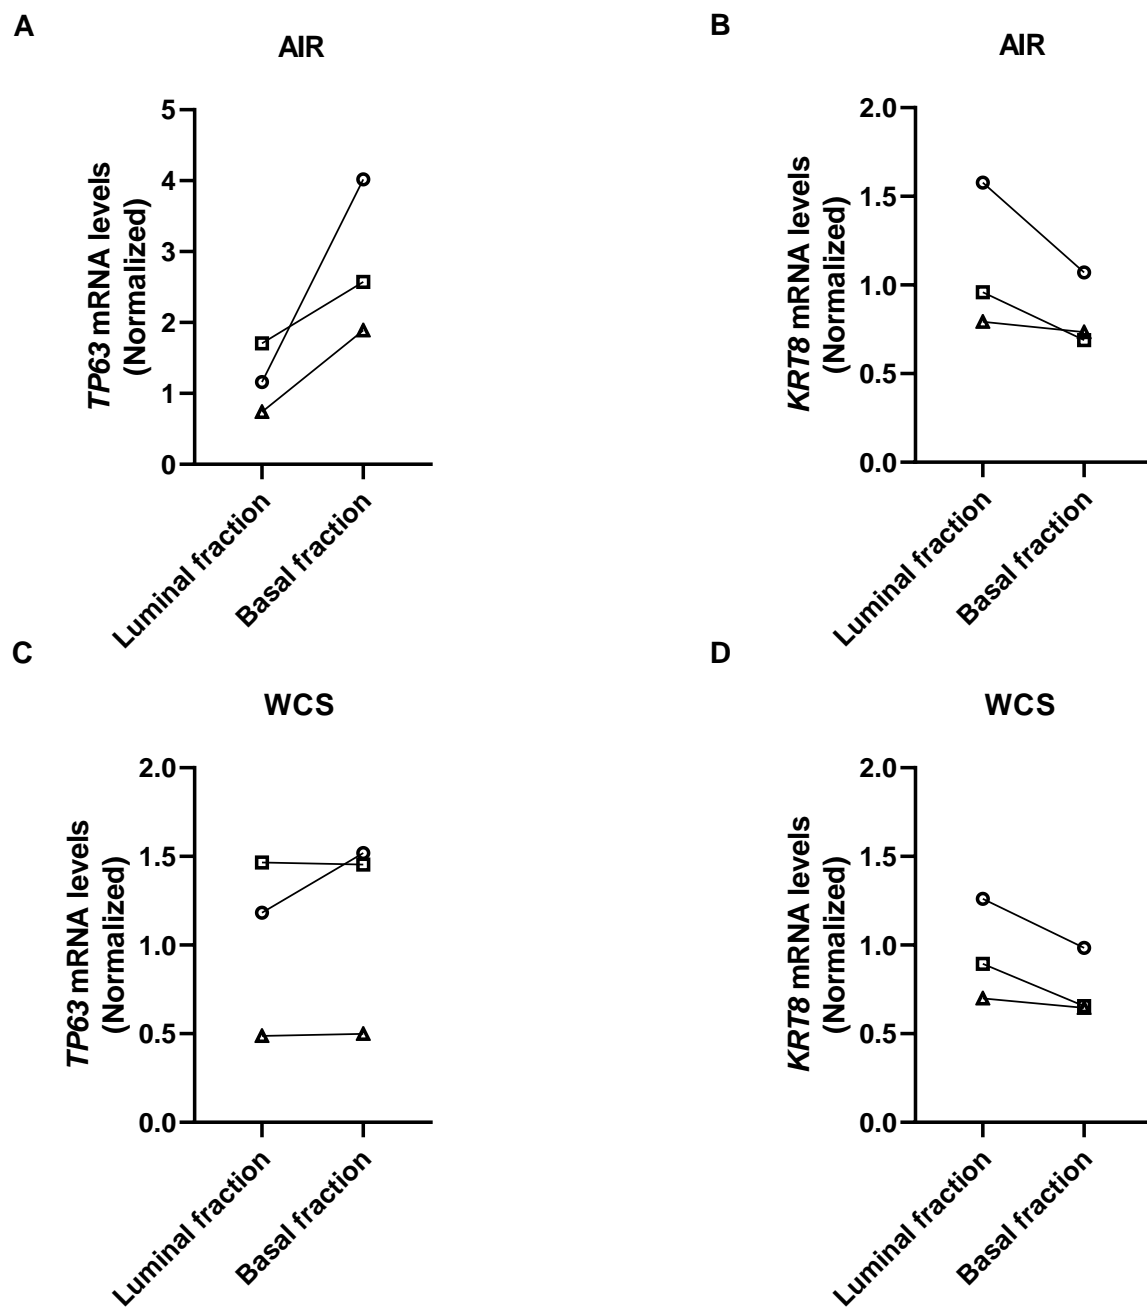

**Fig. S2. Validation of separation of basal and luminal cell fractions from ALI-PBEC.** After 2-weeks of differentiation, ALI-PBEC were exposed to fresh air or WCS from one 3R4F cigarette (University of Kentucky, 2 mg) and separated into luminal and basal cell fractions at 6 h post-exposure using calcium depletion followed by trypsinization (n=3 donors/group). Independent donors are represented by open circles, triangles or squares. Successful separation was identified by measuring gene expression of basal cells marker (Tp63) **(A, C)** and early progenitor cell marker (cytokeratin-8, KRT8) **(B, D)**.

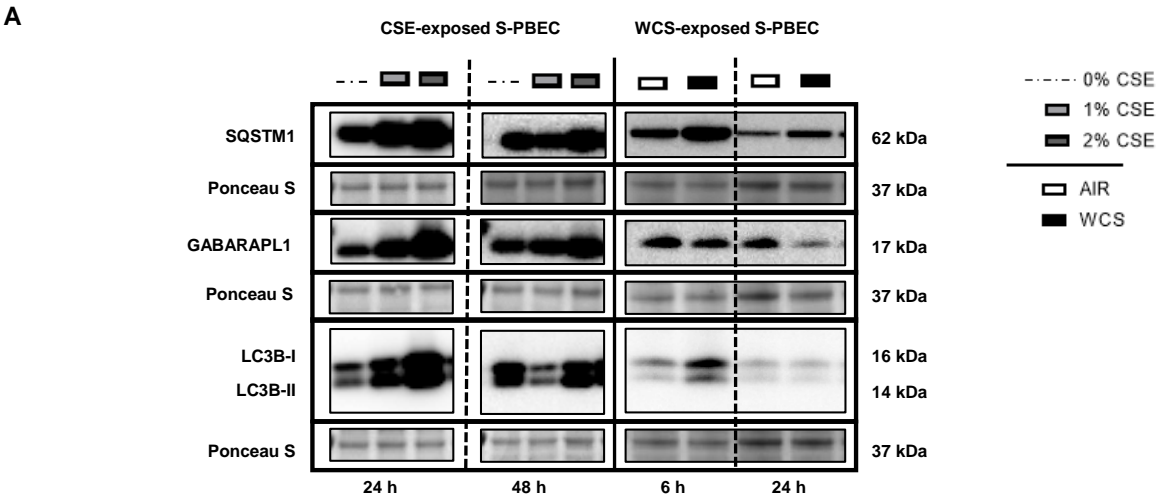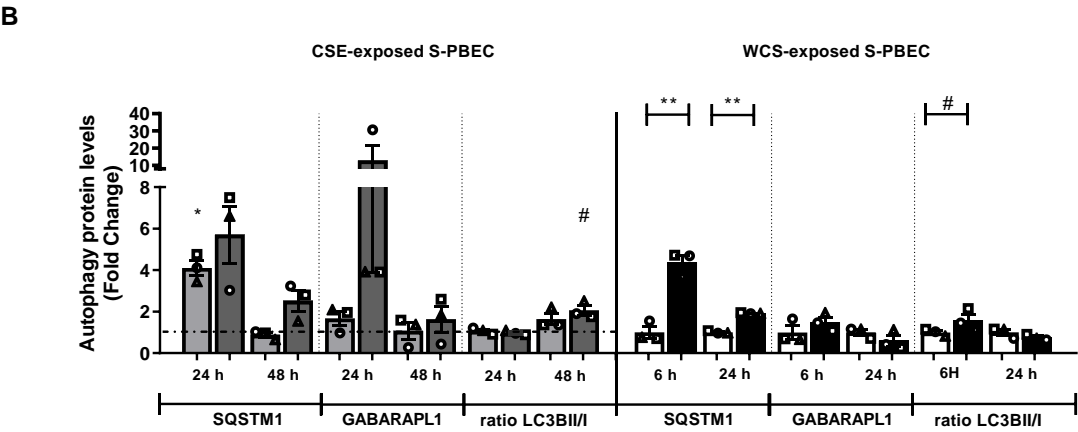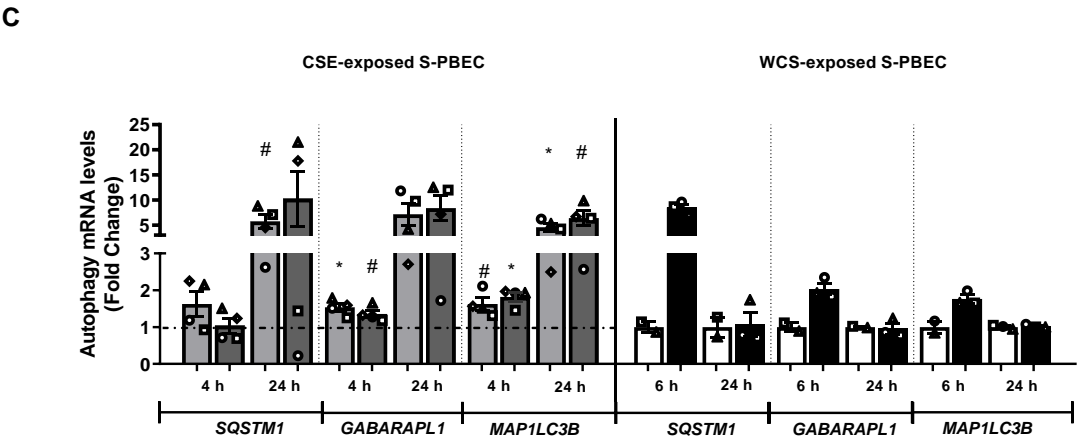

**Fig. S3. Increase in abundance of key constituents involved in autophagy following acute CSE or WCS exposure in S-PBEC.** Undifferentiated S-PBEC were treated with CSE from one 3R4F cigarette (University of Kentucky) diluted in HBSS (0-1-2%) in Lonza starvation medium for 4 h, 24 h or 48 h (n=3-4 donors/group) or undifferentiated S-PBEC cultured on transwells were exposed, after removal of apical medium, to fresh air or WCS from one 3R4F cigarette (University of Kentucky, 2 mg) followed by harvesting of whole-cell lysates after 6 h or 24 h recovery (n=2-3 donors/group). Protein (**A**, **B**) as well as transcript abundance (**C**) of autophagy regulators SQSTM1, GABARAPL1 and ratio LC3BII/I or MAP1LC3B were measured by western blot and real-time qPCR. Representative western blots, including representative parts of the Ponceau S staining, are shown. Data are presented as mean fold change compared to control (0% CSE or air)  $\pm$  s.e.m.. Independent donors are represented by open circles, triangles, squares or diamonds. In case of the CSE-exposed S-PBEC experiments, the symbols reflect the mean of technical triplicates. Statistical differences between the various CSE exposure groups (CSE 1% or 2% versus 0% CSE) were tested using an one-way ANOVA (matched/repeated measures) followed by Sidak's post-hoc test for multiple comparisons, and in case of missing values the mixed-effects models was performed. WCS versus air was tested using a two-tailed paired parametric *t*-test. Statistical significance is indicated as #*p*<0.1, \**p*<0.05 and \*\**p*<0.01 compared to control (0% CSE or air).

A

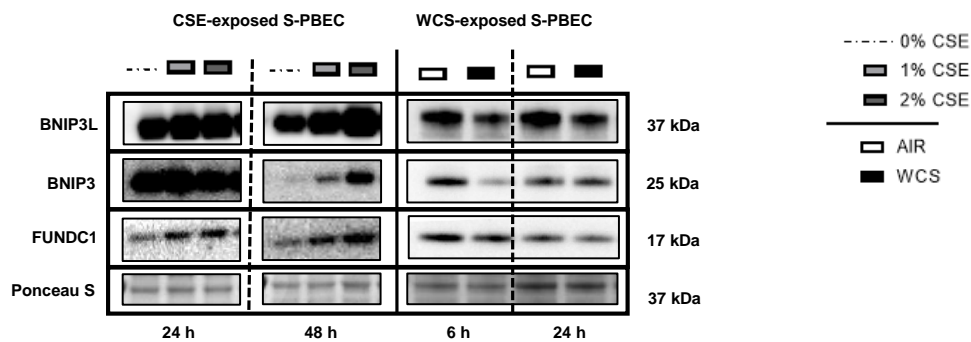

B

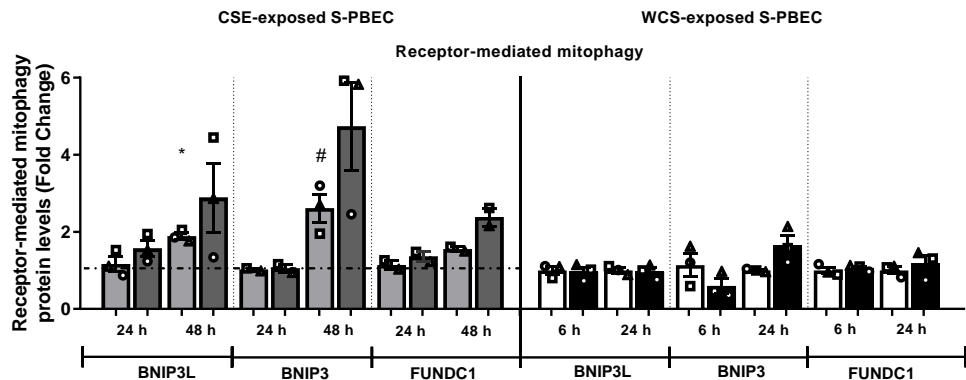

C

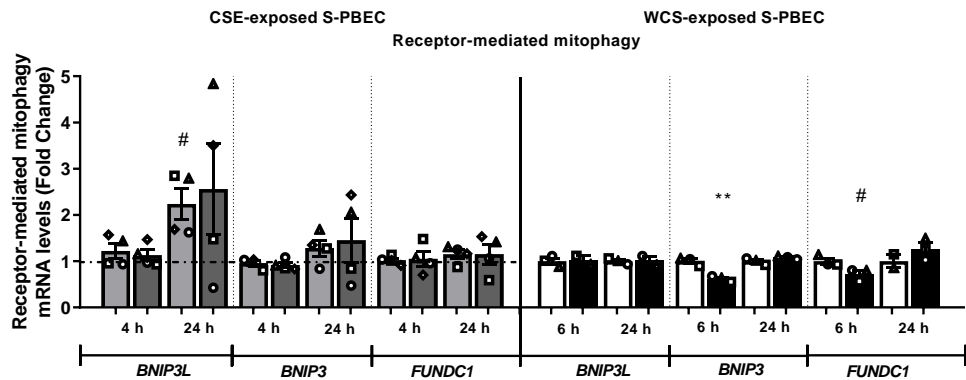

**Fig. S4. Upregulation of constituents of the receptor-mediated mitophagy machinery in CS-exposed S-PBEC.** Undifferentiated S-PBEC were treated with CSE from one 3R4F cigarette (University of Kentucky) diluted in HBSS (0-1-2%) in Lonza starvation medium for 4 h, 24 h or 48 h (n=2-4 donors/group) or undifferentiated S-PBEC cultured on transwells were exposed, after removal of apical medium, to fresh air or WCS from one 3R4F cigarette (University of Kentucky, 2 mg) followed by harvesting of whole-cell lysates after 6 h or 24 h recovery (n=2-3 donors/group). Protein (**A, B**) and mRNA levels (**C**) of regulators involved in receptor-mediated mitophagy (BNIP3L, BNIP3, FUNDC1) were analyzed in whole-cell lysates. Representative western blots, including representative parts of the Ponceau S staining, are shown. Data are presented as mean fold change compared to control (0% CSE or air)  $\pm$  s.e.m.. Independent donors are represented by open circles, triangles, squares or diamonds. In case of the CSE-exposed S-PBEC experiments, the symbols reflect the mean of technical triplicates. Statistical differences between the various CSE exposure groups (CSE 1% or 2% versus 0% CSE) were tested using an one-way ANOVA (matched/repeated measures) followed by Sidak's post-hoc test for multiple comparisons, and in case of missing values the mixed-effects models was performed. WCS versus air was tested using a two-tailed paired parametric *t*-test. Statistical significance is indicated as <sup>#</sup>p<0.1, \*p<0.05 and \*\*p<0.01 compared to control (0% CSE or air).



**A**

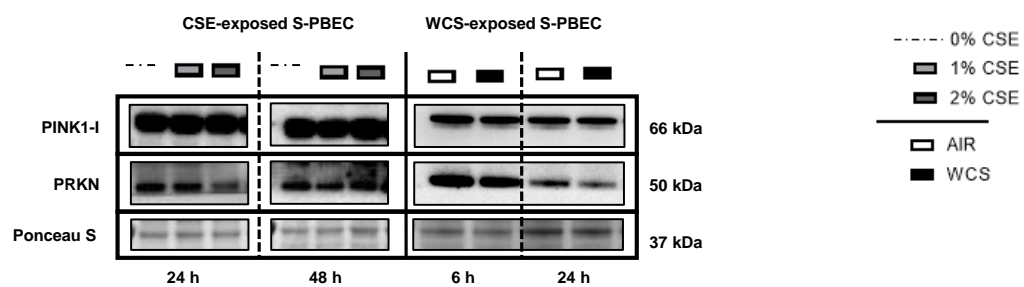

**B**

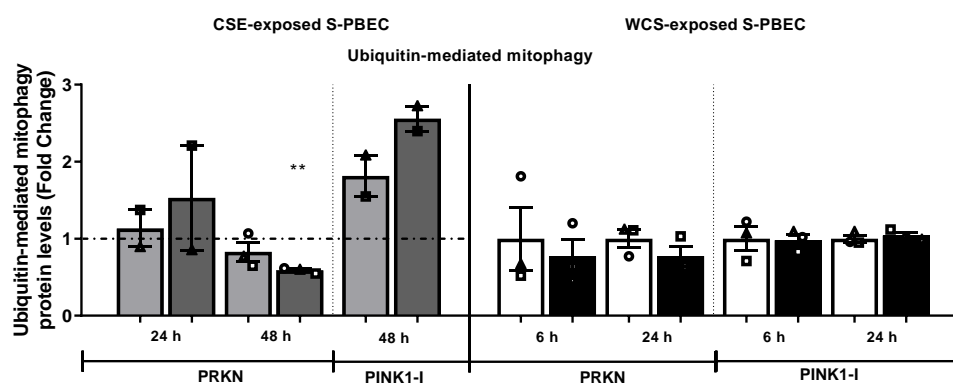

**C**

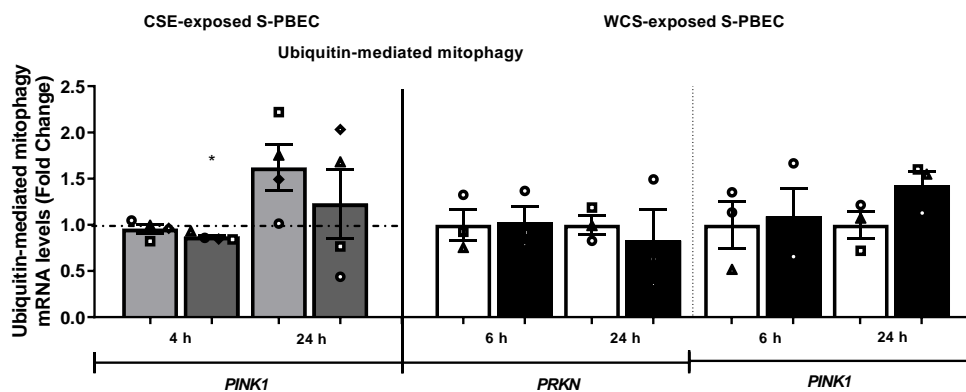

**Fig. S5. Modulation of ubiquitin-mediated mitophagy markers in CS-exposed S-PBEC.** Undifferentiated S-PBEC were treated with CSE from one 3R4F cigarette (University of Kentucky) diluted in HBSS (0-1-2%) in Lonza starvation medium for 4 h, 24 h or 48 h (n=2-4 donors/group) or undifferentiated S-PBEC cultured on transwells were exposed, after removal of apical medium, to fresh air or WCS from one 3R4F cigarette (University of Kentucky, 2 mg) followed by harvesting of whole-cell lysates after 6 h or 24 h recovery (n=3 donors/group). Protein (**A, B**) and mRNA levels (**C**) of regulators involved in ubiquitin-mediated mitophagy (PRKN, PINK1) were analyzed in whole-cell lysates. Western blot analysis revealed one distinct band for PINK1 protein corresponding with expected molecular weight for PINK1-I (66 kDa). Representative western blots, including representative parts of the Ponceau S staining, are shown. Data are presented as mean fold change compared to control (0% CSE or air)  $\pm$  s.e.m.. Independent donors are represented by open circles, triangles, squares or diamonds. In case of the CSE-exposed S-PBEC experiments, the symbols reflect the mean of technical triplicates. Statistical differences between the various CSE exposure groups (CSE 1% or 2% versus 0% CSE) were tested using an one-way ANOVA (matched/repeated measures) followed by Sidak's post-hoc test for multiple comparisons, and in case of missing values the mixed-effects models was performed. WCS versus air was tested using a two-tailed paired parametric *t*-test. Statistical significance is indicated as \* $p < 0.05$  and \*\* $p < 0.01$  compared to control (0% CSE or air).

**A**

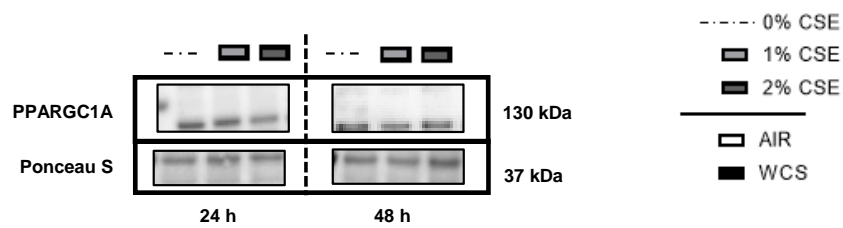

**B**

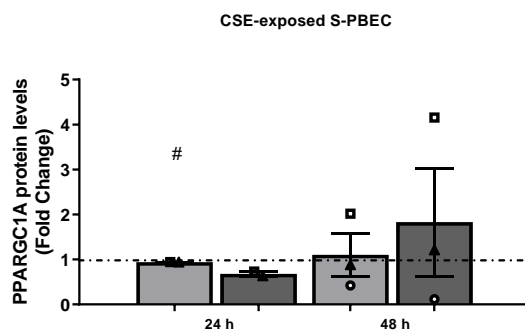

**C**

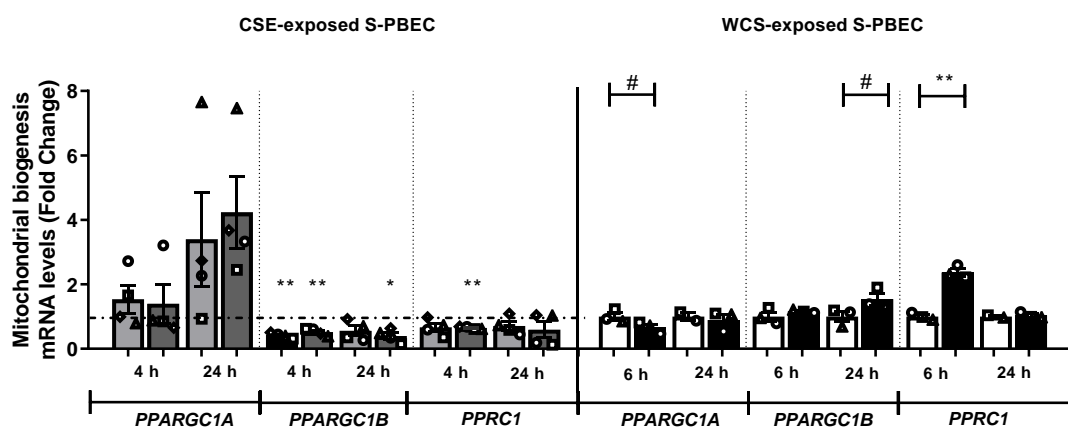

**Fig. S6. Alterations in expression of transcript levels of transcriptional co-activators of the PPARGC1 network in response to acute CS exposure in S-PBEC.** Undifferentiated S-PBEC were treated with CSE from one 3R4F cigarette (University of Kentucky) diluted in HBSS (0-1-2%) in Lonza starvation medium for 4 h, 24 h or 48 h (n=2-4 donors/group) or undifferentiated S-PBEC cultured on transwells were exposed, after removal of apical medium, to fresh air or WCS from one 3R4F cigarette (University of Kentucky, 2 mg) followed by harvesting of whole-cell lysates after 6 h or 24 h recovery (n=2-3 donors/group). Protein (**A, B**) as well as transcript abundance (**C**) of transcriptional co-activators involved in the PPARGC1 network (PPARGC1A, PPARGC1B, PPRC1) are presented. Representative western blots, including representative parts of the Ponceau S staining, are shown. Data are presented as mean fold change compared to control (0% CSE or air)  $\pm$  s.e.m.. Independent donors are represented by open circles, triangles, squares or diamonds. In case of the CSE-exposed S-PBEC experiments, the symbols reflect the mean of technical triplicates. Statistical differences between the various CSE exposure groups (CSE 1% or 2% versus 0% CSE) were tested using an one-way ANOVA (matched/repeated measures) followed by Sidak's post-hoc test for multiple comparisons, and in case of missing values the mixed-effects models was performed. WCS versus air was tested using a two-tailed paired parametric *t*-test. Statistical significance is indicated as <sup>#</sup>p<0.1, \*p<0.05 and \*\*p<0.01 compared to control (0% CSE or air).

**A**

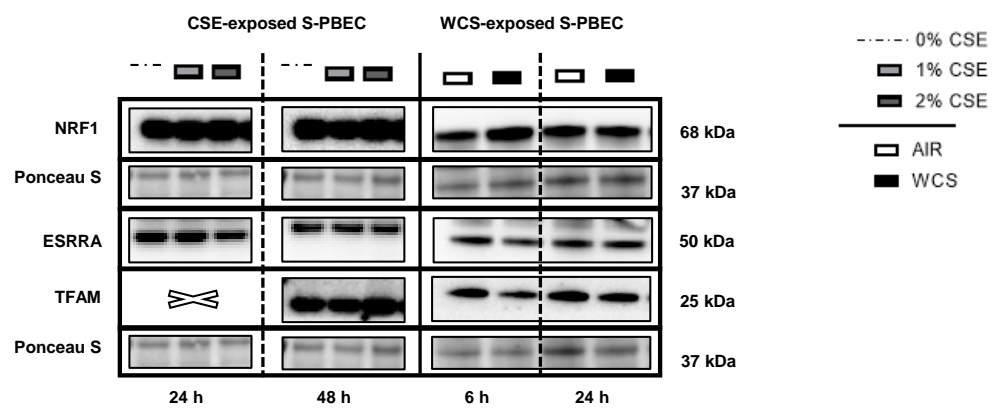

**B**

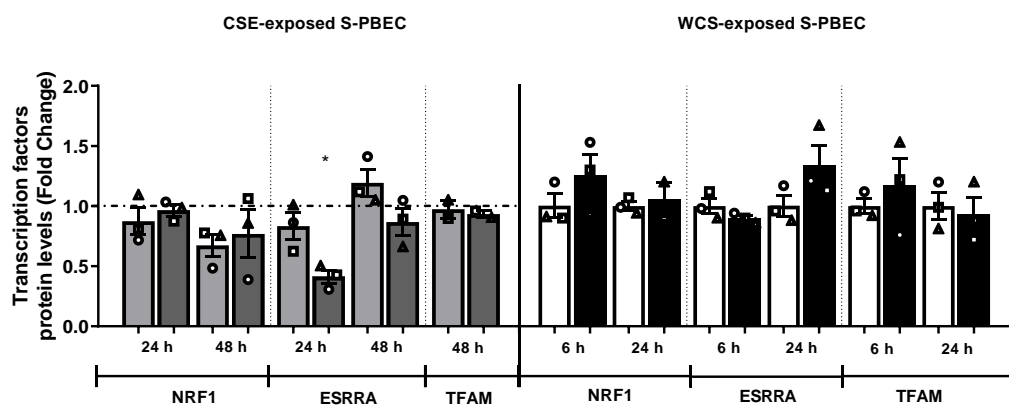

**C**

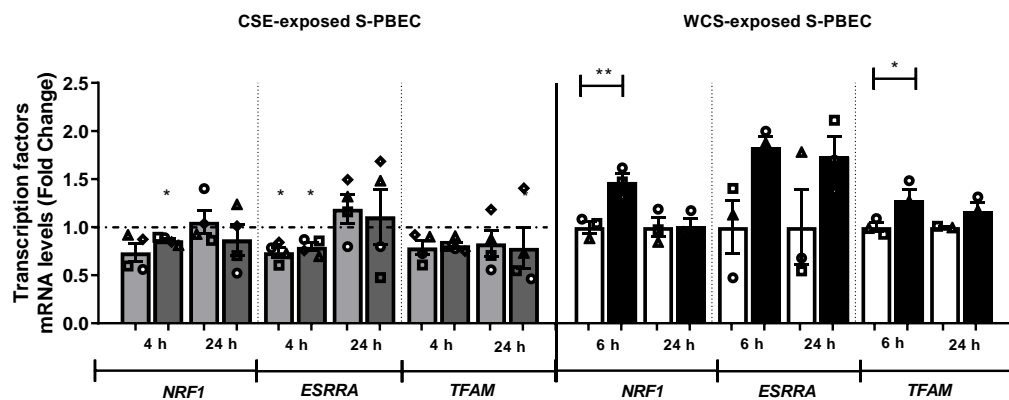

**Fig. S7. Changes in the abundance of PPARGC1-coactivated transcription factors after CS exposure in S-PBEC.** Undifferentiated S-PBEC were treated with CSE from one 3R4F cigarette (University of Kentucky) diluted in HBSS (0-1-2%) in Lonza starvation medium for 4 h, 24 h or 48 h (n=3-4 donors/group) or undifferentiated S-PBEC cultured on transwells were exposed, after removal of apical medium, to fresh air or WCS from one 3R4F cigarette (University of Kentucky, 2 mg) followed by harvesting of whole-cell lysates after 6 h or 24 h recovery (n=2-3 donors/group). Protein (**A**, **B**) and mRNA levels (**C**) of PPARGC1-coactivated transcription regulators, NRF1, ESRRA and TFAM, were measured by western blotting or real-time qPCR. Representative western blots, including representative parts of the Ponceau S staining, are shown. Data are presented as mean fold change compared to control (0% CSE or air)  $\pm$  s.e.m.. Independent donors are represented by open circles, triangles, squares or diamonds. In case of the CSE-exposed S-PBEC experiments, the symbols reflect the mean of technical triplicates. Statistical differences between the various CSE exposure groups (CSE 1% or 2% versus 0% CSE) were tested using an one-way ANOVA (matched/repeated measures) followed by Sidak's post-hoc test for multiple comparisons, and in case of missing values the mixed-effects models was performed. WCS versus air was tested using a two-tailed paired parametric *t*-test. Statistical significance is indicated as \**p*<0.05 and \*\**p*<0.01 compared to control (0% CSE or air).

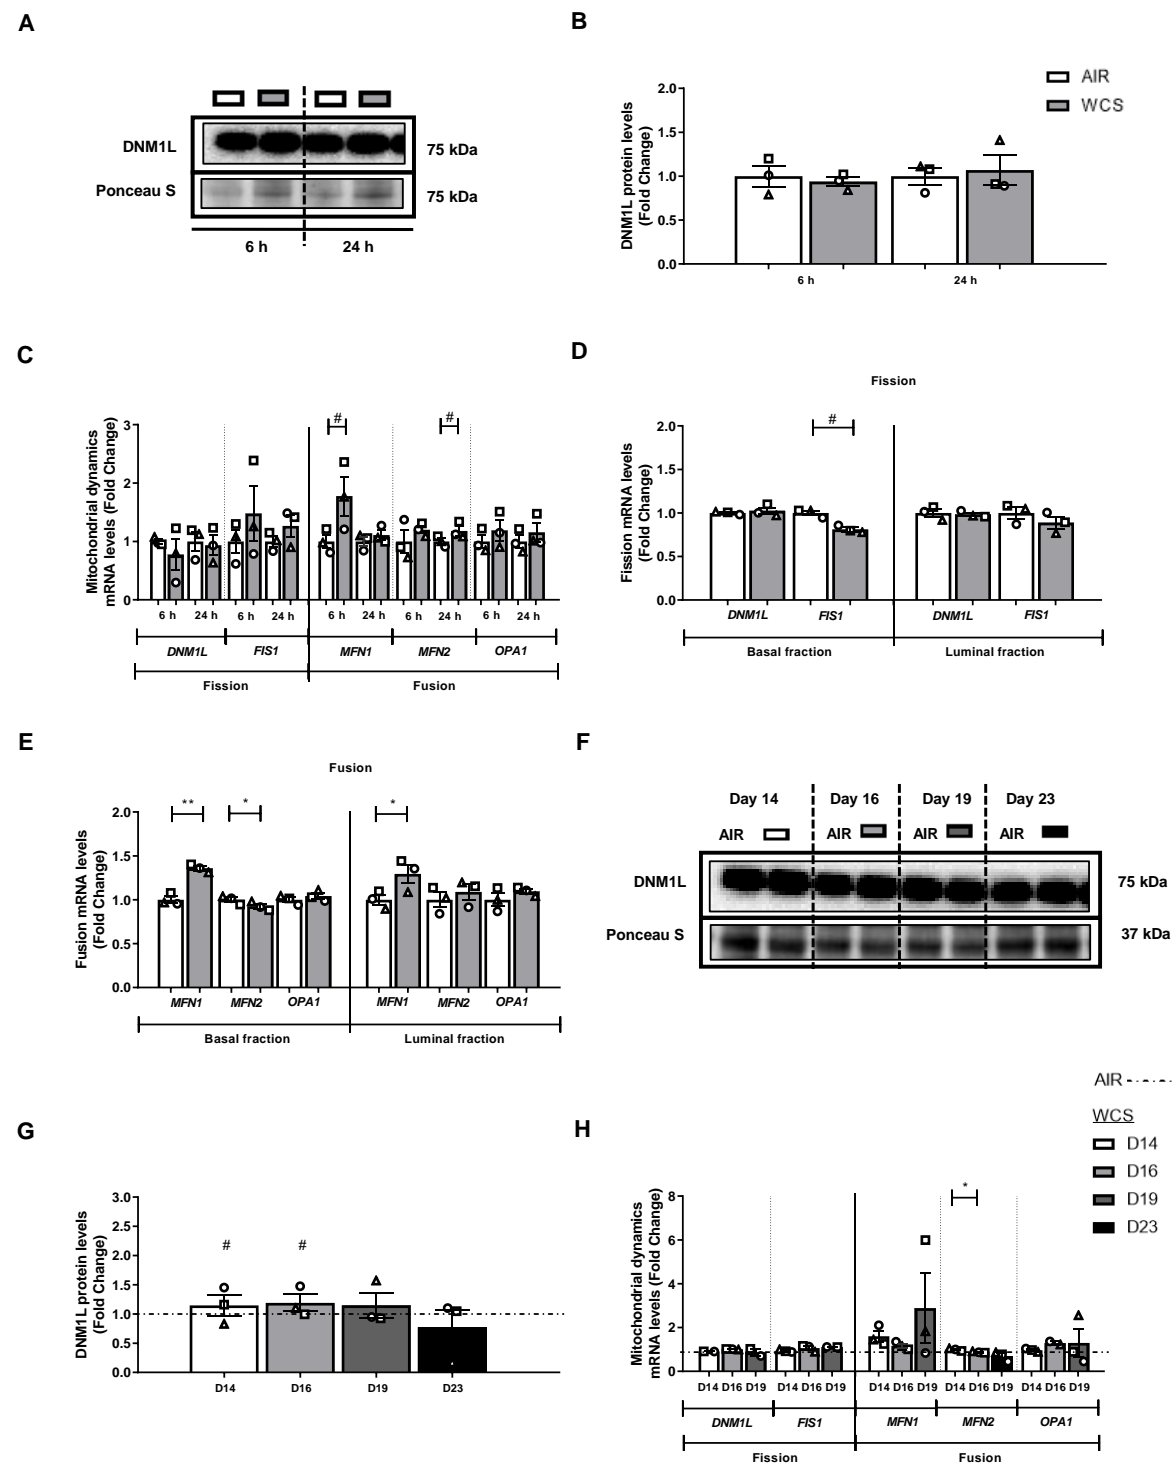

**Fig. S8. Changes in mitochondrial dynamics markers in response to WCS exposure in ALI-PBEC.** After 2-weeks of differentiation, ALI-PBEC were exposed to fresh air or WCS from one 3R4F cigarette (University of Kentucky, 2 mg) and whole-cell lysates were harvested after 6h and 24 h, and the basal and luminal fractions were harvested only at 6 h post-exposure (n=3 donors/group). Protein (**A, B**) and mRNA levels (**C, D, E**) of fission- and fusion-associated markers were analyzed in whole-cell lysates or basal/luminal cell fractions post-exposure. Data are presented as mean fold change compared to control (air)  $\pm$  s.e.m.. Independent donors are represented by open circles, triangles or squares. Statistical differences between WCS versus air were tested using a two-tailed paired parametric *t*-test, <sup>#</sup>*p*<0.1, \**p*<0.05 and \*\**p*<0.01. ALI-PBEC were 1x daily exposed to fresh air or WCS from one 3R4F cigarette (University of Kentucky, 2 mg) during differentiation for 14 days followed by a cessation period up to 10 days. Cells were harvested on Day 14 (24 h after the last exposure), 16, 19 and 23 (n=2-3 donors/group). Abundance of DNM1L protein (**F, G**) and transcript abundance of fission and fusion regulators (**H**) are shown. Representative western blots, including representative parts of the Ponceau S staining, are shown. Data are presented as mean fold change compared to control (air or WCS Day 14)  $\pm$  s.e.m.. Independent donors are represented by open circles, triangles or squares. Statistical differences between WCS versus air after smoking cessation in ALI-PBEC on each day was tested using a two-tailed paired parametric *t*-test (e.g., WCS Day 14 versus air). Comparison of various groups to test the difference of WCS Day 16, 19, 23 versus Day 14 in WCS chronic smoking cessation experiments was conducted using an one-way ANOVA followed by Sidak's post-hoc test for multiple comparisons, and in case of missing values the mixed-effects models was performed. Statistical significance is indicated as <sup>#</sup>*p*<0.1 and \**p*<0.05 compared to control (air or WCS Day 14).



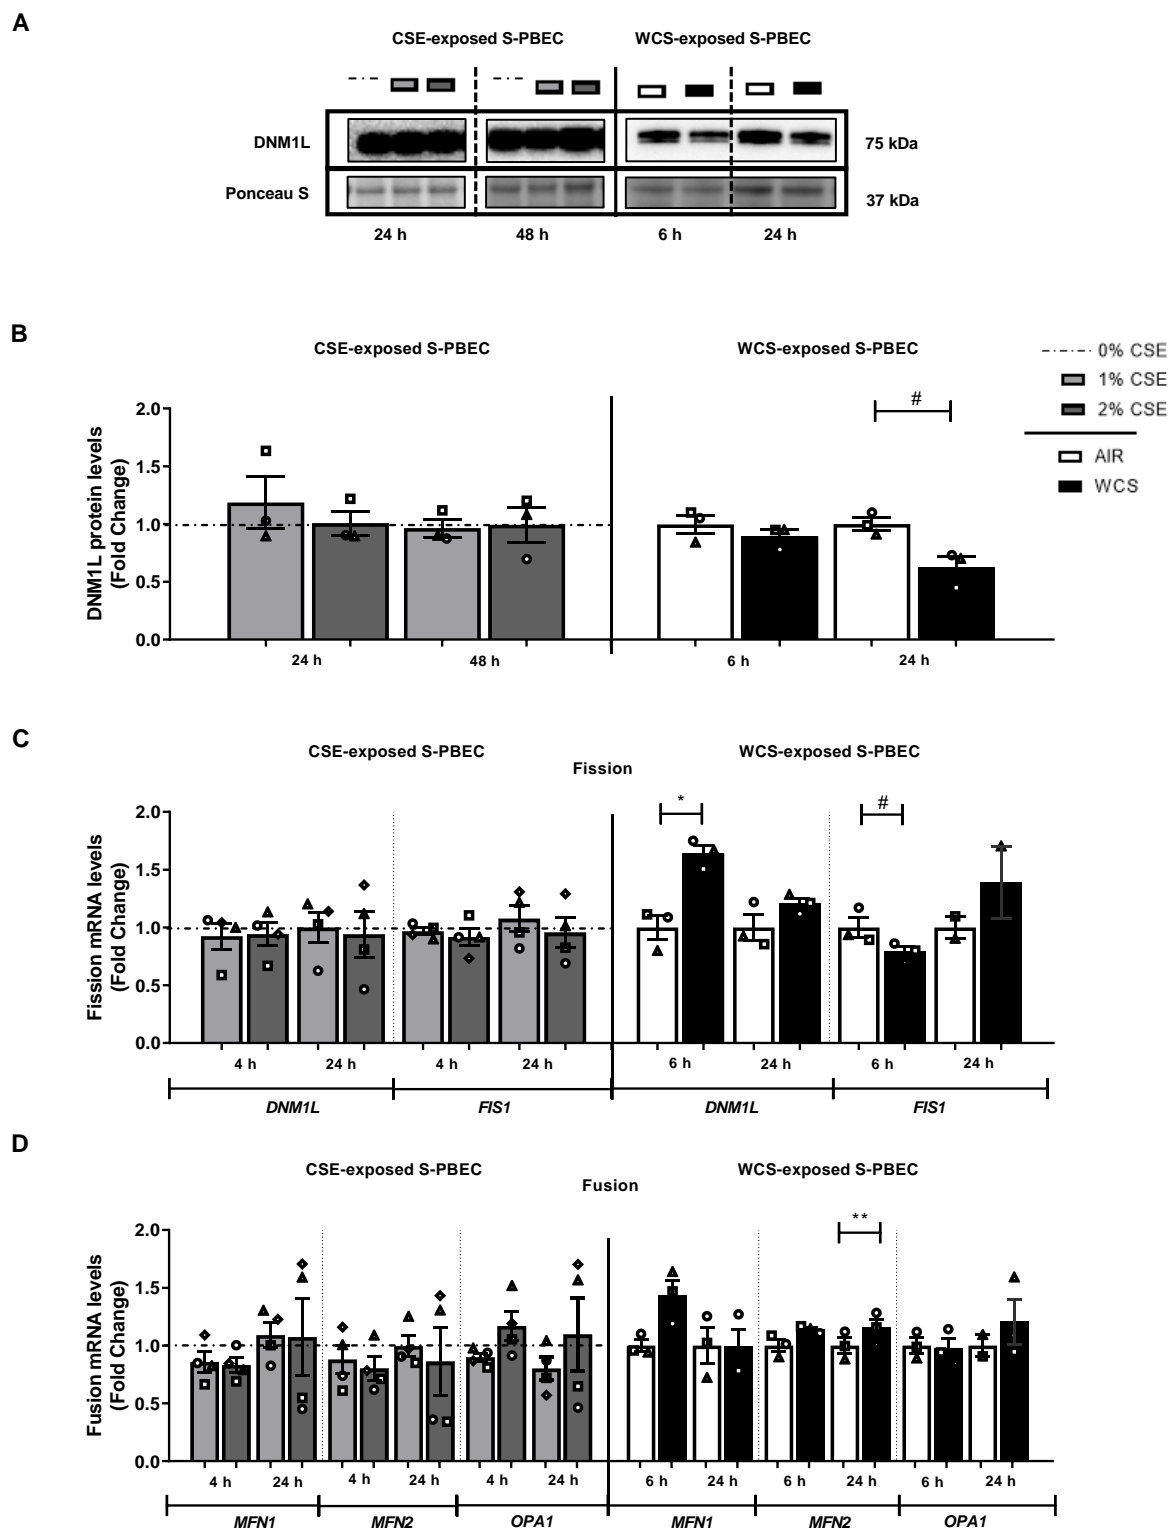

**Fig. S9. Aberrant protein and transcript abundance of fission- and fusion-associated markers in S-PBEC.** Undifferentiated S-PBEC were treated with CSE from one 3R4F cigarette (University of Kentucky) diluted in HBSS (0-1-2%) in Lonza starvation medium for 4 h, 24 h or 48 h (n=3-4 donors/group) or undifferentiated S-PBEC cultured on transwells were exposed, after removal of apical medium, to fresh air or WCS from one 3R4F cigarette (University of Kentucky, 2 mg) followed by harvesting of whole-cell lysates after 6 h or 24 h recovery (n=2-3 donors/group). Protein (**A, B**) and mRNA levels (**C**) of fission-associated markers (DNM1L, FIS1) and gene expression of fusion-associated markers (MFN1, MFN2, OPA1) (**D**) were measured using western blot and real-time qPCR. Representative western blots, including representative parts of the Ponceau S staining, are shown. Data are presented as mean fold change compared to control (0% CSE or air)  $\pm$  s.e.m.. Independent donors are represented by open circles, triangles, squares or diamonds. In case of the CSE-exposed S-PBEC experiments, the symbols reflect the mean of technical triplicates. Statistical differences between the various CSE exposure groups (CSE 1% or 2% versus 0% CSE) were tested using an one-way ANOVA (matched/repeated measures) followed by Sidak's post-hoc test for multiple comparisons, and in case of missing values the mixed-effects models was performed. WCS versus air was tested using a two-tailed paired parametric *t*-test. Statistical significance is indicated as <sup>#</sup>p<0.1, \*p<0.05 and \*\*p<0.01 compared to control (0% CSE or air).

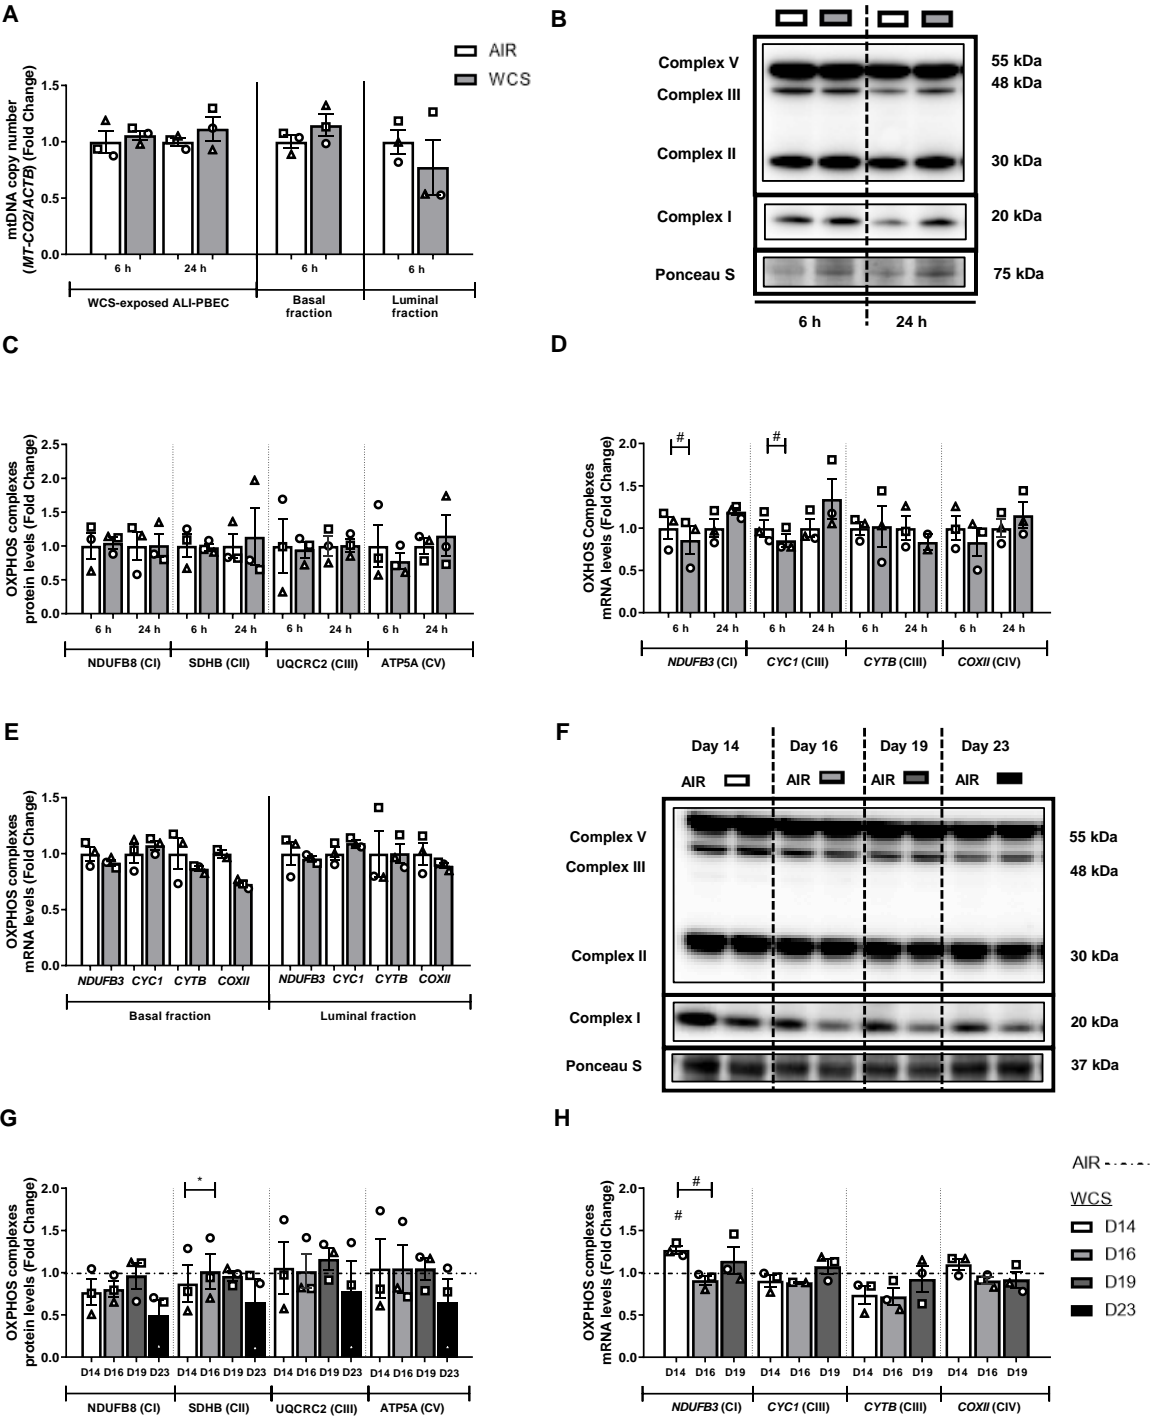

**Fig. S10. Unaltered abundance of subunits of the electron transport chain in WCS-exposed ALI-PBEC.** After 2-weeks of differentiation, ALI-PBEC were exposed to fresh air or WCS from one 3R4F cigarette (University of Kentucky, 2 mg) and whole-cell lysates were harvested after 6h and 24 h, and the basal and luminal fractions were harvested only at 6 h post-exposure (n=2-3 donors/group). Mitochondrial DNA copy number **(A)**, protein **(B, C)** as well as transcript levels **(D, E)** of nuclear and mitochondrial-encoded subunits of the electron transport chain (Complex I (CI), Complex II (CII), Complex III (CIII), Complex IV (CIV), Complex V (CV)) were analyzed in whole-cell lysates or basal and luminal fractions post-exposure. Data are presented as mean fold change compared to control (air)  $\pm$  s.e.m.. Independent donors are represented by open circles, triangles or squares. Statistical differences between WCS versus air were tested using a two-tailed paired parametric *t*-test, <sup>#</sup>*p*<0.1. ALI-PBEC were 1x daily exposed to fresh air or WCS from one 3R4F cigarette (University of Kentucky, 2 mg) during differentiation for 14 days followed by a cessation period up to 10 days. Cells were harvested on Day 14 (24 h after the last exposure), 16, 19 and 23 (n=2-3 donors/group). Protein **(F, G)** and mRNA expression **(H)** of subunits of the electron transport chain are analyzed. Representative western blots, including representative parts of the Ponceau S staining, are shown. Data are presented as mean fold change compared to control (air or WCS Day 14)  $\pm$  s.e.m.. Independent donors are represented by open circles, triangles or squares. Statistical differences between WCS versus air after smoking cessation in ALI-PBEC on each day was tested using a two-tailed paired parametric *t*-test (e.g, WCS Day 14 versus air). Comparison of various groups to test the difference of WCS Day 16, 19, 23 versus Day 14 in WCS chronic smoking cessation experiments was conducted using an one-way ANOVA followed by Sidak's post-hoc test for multiple comparisons, and in case of missing values the mixed-effects models was performed. Statistical significance is indicated as <sup>#</sup>*p*<0.1 and \**p*<0.05 compared to control (air or WCS Day 14).

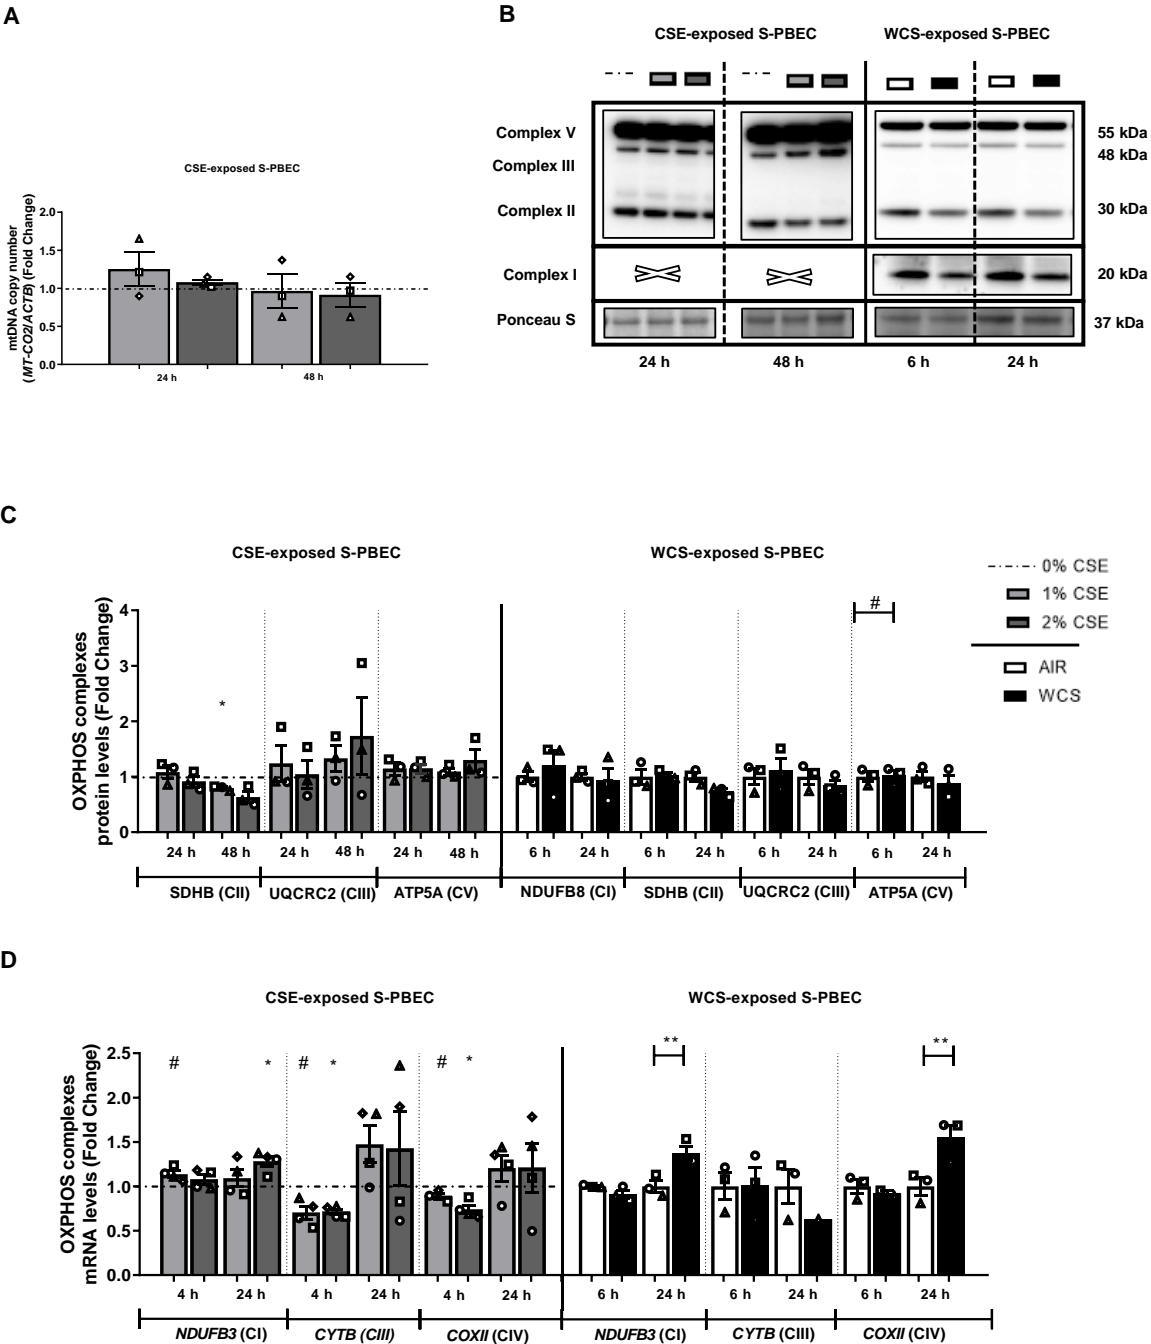

**Fig. S11. Modulation in the abundance of subunits of the electron transport chain in CS-exposed S-PBEC.** Undifferentiated S-PBEC were treated with CSE from one 3R4F cigarette (University of Kentucky) diluted in HBSS (0-1-2%) in Lonza starvation medium for 4 h, 24 h or 48 h (n=3-4 donors/group) or undifferentiated S-PBEC cultured on transwells were exposed, after removal of apical medium, to fresh air or WCS from one 3R4F cigarette (University of Kentucky, 2 mg) followed by harvesting of whole-cell lysates after 6 h or 24 h recovery (n=1-3 donors/group). Mitochondrial DNA copy number (**A**), protein (**B**, **C**) as well as transcript levels (**D**) of nuclear and mitochondrial-encoded subunits of the electron transport chain (Complex I (CI), Complex II (CII), Complex III (CIII), Complex IV (CIV), Complex V (CV)) were analyzed in whole-cell lysates. Representative western blots, including representative parts of the Ponceau S staining, are shown. Data are presented as mean fold change compared to control (0% CSE or air)  $\pm$  s.e.m.. Independent donors are represented by open circles, triangles, squares or diamonds. In case of the CSE-exposed S-PBEC experiments, the symbols reflect the mean of technical triplicates. Statistical differences between the various CSE exposure groups (CSE 1% or 2% versus 0% CSE) were tested using an one-way ANOVA (matched/repeated measures) followed by Sidak's post-hoc test for multiple comparisons, and in case of missing values the mixed-effects models was performed. WCS versus air was tested using a two-tailed paired parametric *t*-test. Statistical significance is indicated as <sup>#</sup>p<0.1, \*p<0.05 and \*\*p<0.01 compared to control (0% CSE or air).

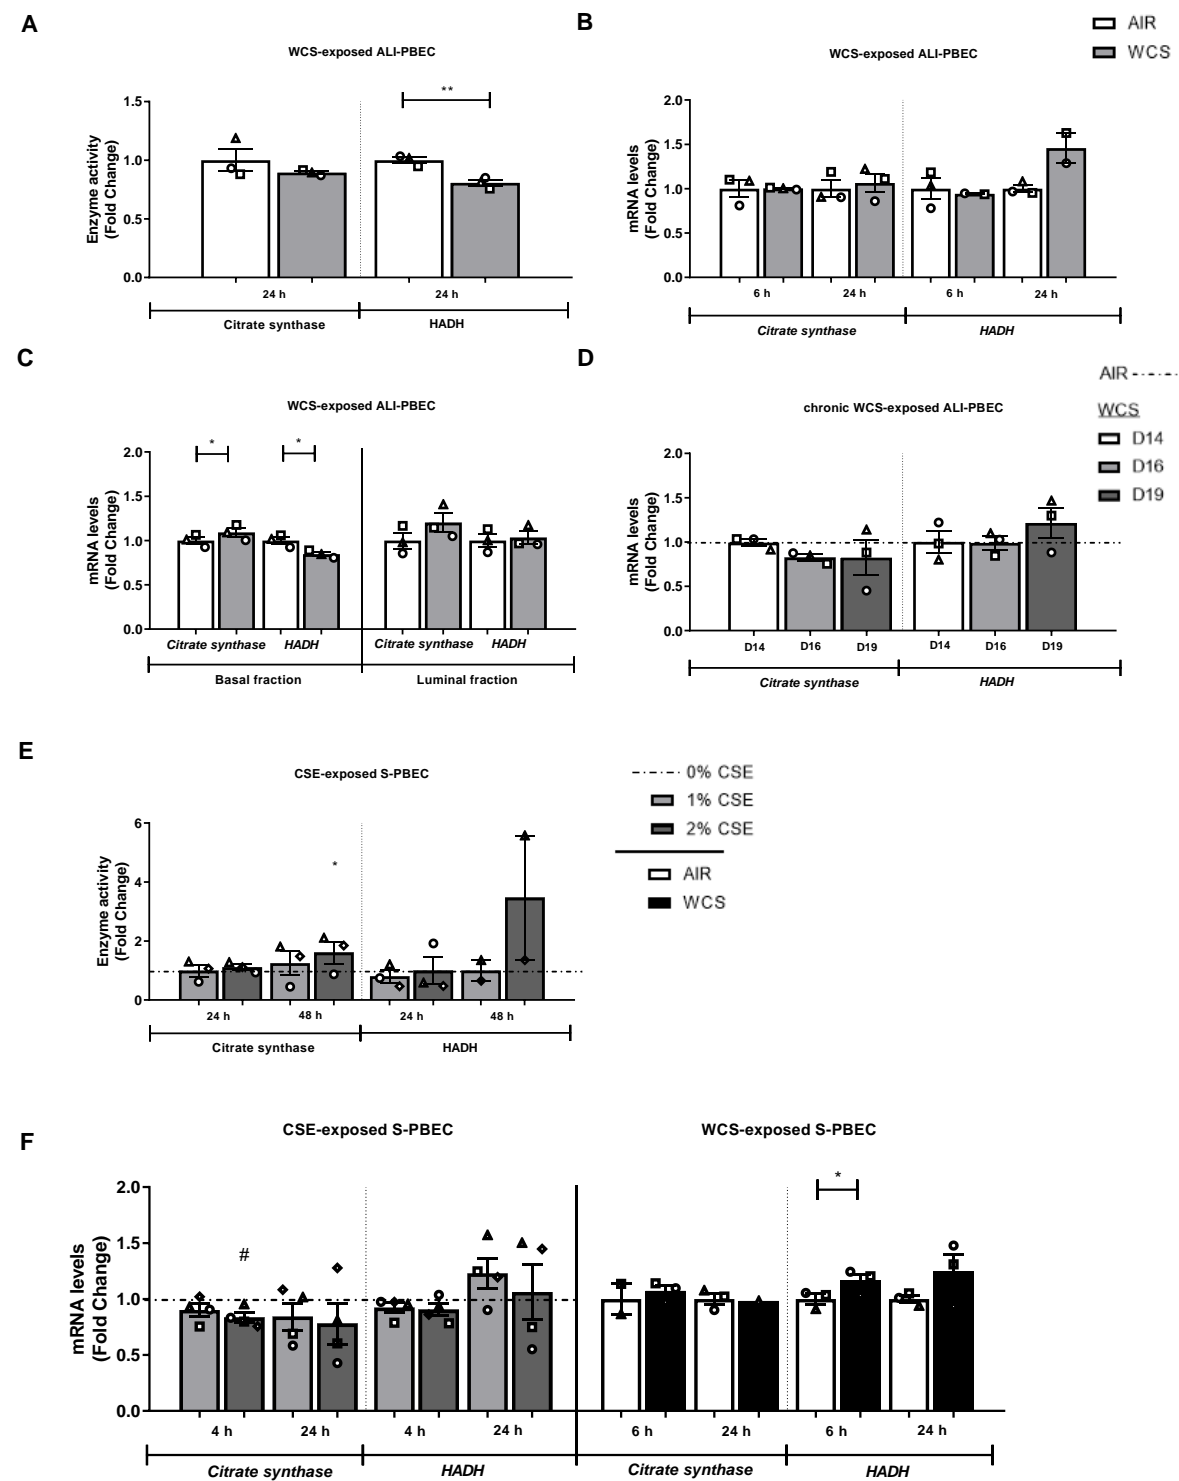

**Fig. S12. Disruption of activity and abundance of key components involved in the fatty acid  $\beta$ -oxidation in CS-exposed ALI- and S-PBEC.** After 2-weeks of differentiation, ALI-PBEC were exposed to fresh air or WCS from one 3R4F cigarette (University of Kentucky, 2 mg) and whole-cell lysates were harvested after 6h and 24 h, and the basal and luminal fractions were harvested only at 6 h post-exposure (n=2-3 donors/group). Enzyme activities of citrate synthase and HADH **(A)** and related transcript abundance in whole-cell lysates **(B)** or basal and luminal fractions **(C)** were assessed in ALI-PBEC. Next, ALI-PBEC were 1x daily exposed to fresh air or WCS from one 3R4F cigarette (University of Kentucky, 2 mg) during differentiation for 14 days followed by a cessation period up to 10 days. Cells were harvested on Day 14 (24 h after the last exposure), 16 and 19 (n=3 donors/group). Transcript abundance **(D)** of *citrate synthase* and *HADH* were measured. Undifferentiated S-PBEC were treated with CSE from one 3R4F cigarette (University of Kentucky) diluted in HBSS (0-1-2%) in Lonza starvation medium for 4 h, 24 h or 48 h (n=4 donors/group) or undifferentiated S-PBEC cultured on transwells were exposed, after removal of apical medium, to fresh air or WCS from one 3R4F cigarette (University of Kentucky, 2 mg) followed by harvesting of whole-cell lysates after 6 h or 24 h recovery (n=1-3 donors/group). Cell lysates were used to measure enzyme activities of citrate synthase and HADH **(E)** and related transcript abundance **(F)**. Data are presented as mean fold change compared to control (air, 0% CSE or WCS Day 14)  $\pm$  s.e.m.. Independent donors are represented by open circles, triangles, squares or diamonds. In case of the CSE-exposed S-PBEC experiments, the symbols reflect the mean of technical triplicates. Statistical differences between WCS versus air or WCS versus air after smoking cessation in ALI-PBEC on each day (e.g., WCS Day 14 versus air) were tested using a two-tailed paired parametric *t*-test. If comparison of various groups was required in case of the CSE exposure (CSE 1% or 2% versus 0% CSE) or in WCS chronic smoking cessation experiments (WCS Day 16, 19 versus WCS Day 14), an one-way ANOVA (matched/repeated measures) followed by Sidak's post-hoc test for multiple comparisons was conducted, and in case of missing values the mixed-effects models was performed. Statistical significance is indicated as <sup>#</sup>p<0.1, \*p<0.05 and \*\*p<0.01 compared to control (air, 0% CSE or WCS Day 14).



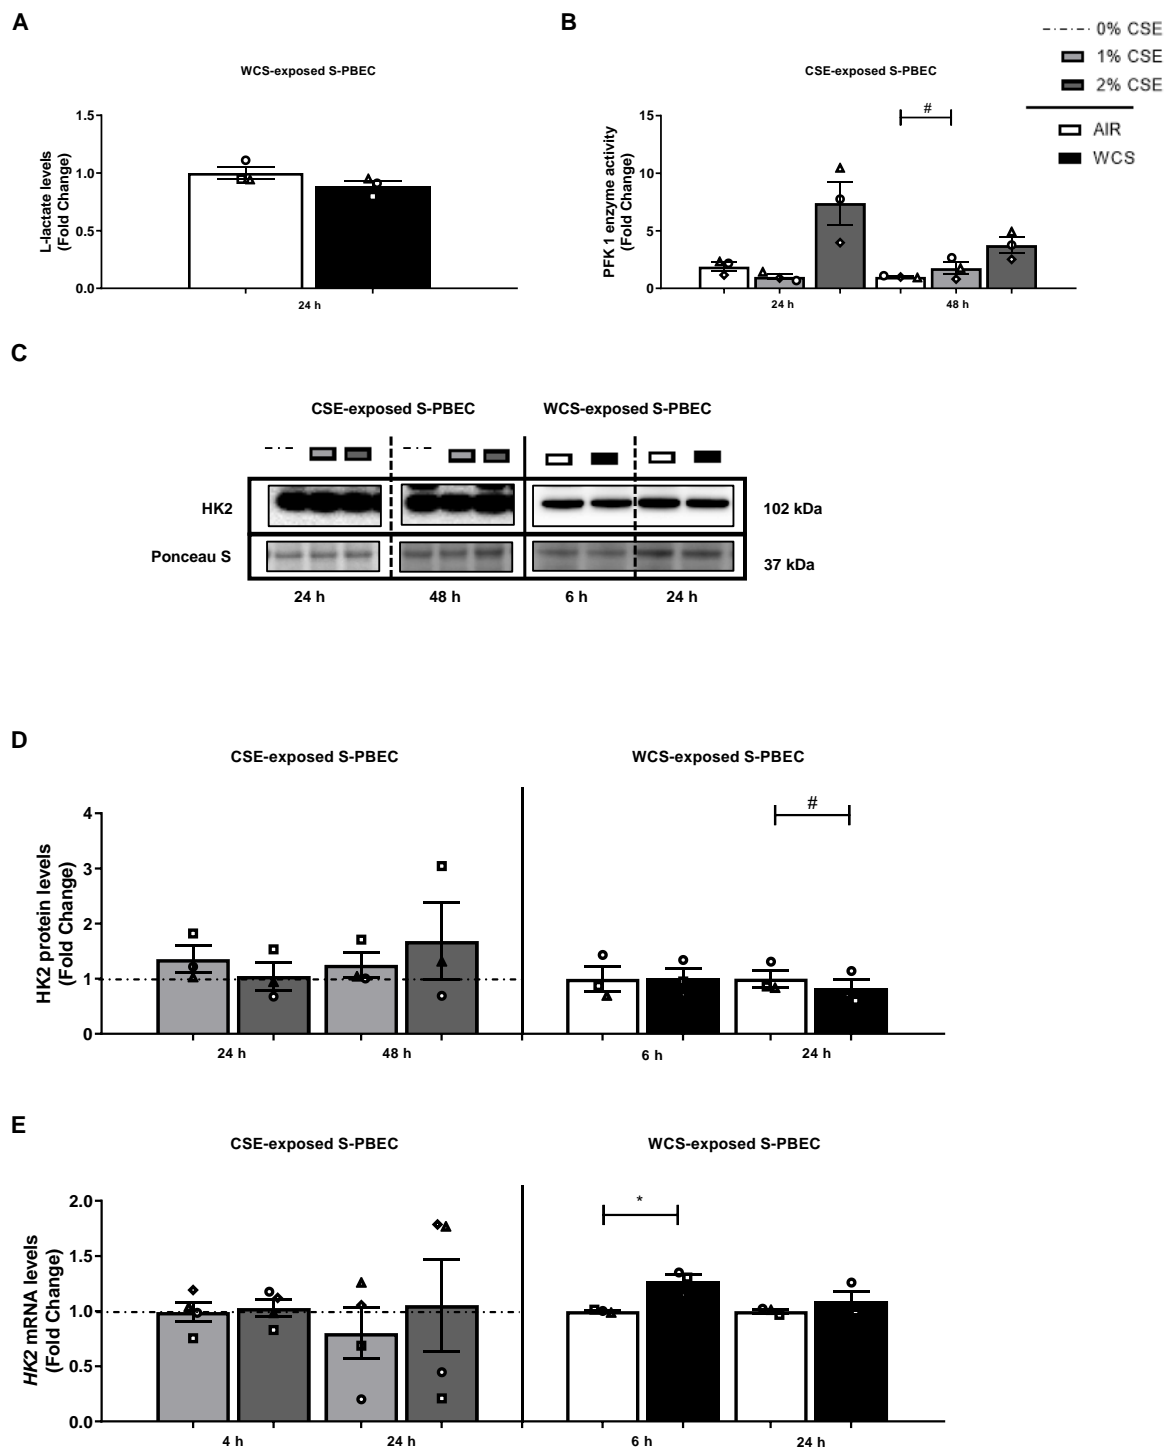

**Fig. S13. Glycolytic shift after CS exposure in S-PBEC.** Undifferentiated S-PBEC were treated with CSE from one 3R4F cigarette (University of Kentucky) diluted in HBSS (0-1-2%) in Lonza starvation medium for 4 h, 24 h or 48 h (n=3-4 donors/group) or undifferentiated S-PBEC cultured on transwells were exposed, after removal of apical medium, to fresh air or WCS from one 3R4F cigarette (University of Kentucky, 2 mg) followed by harvesting of whole-cell lysates after 6 h or 24 h recovery (n=3 donors/group). L-lactate levels (**A**), PFK 1 enzyme activity (**B**) as well as protein (**C, D**) and mRNA levels (**E**) of HK2 were analyzed in S-PBEC. Representative western blots, including representative parts of the Ponceau S staining, are shown. Data are presented as mean fold change compared to control (0% CSE or air)  $\pm$  s.e.m.. Independent donors are represented by open circles, triangles, squares or diamonds. In case of the CSE-exposed S-PBEC experiments, the symbols reflect the mean of technical triplicates. WCS versus air was tested using a two-tailed paired parametric *t*-test. Statistical differences between the various CSE exposure groups (CSE 1% or 2% versus 0% CSE) were tested using an one-way ANOVA (matched/repeated measures) followed by Sidak's post-hoc test for multiple comparisons, and in case of missing values the mixed-effects models was performed. Statistical significance is indicated as <sup>#</sup>p<0.1 and \*p<0.05 compared to control (0% CSE or air).

**Table S1. Human primers sequences used for real-time quantitative PCR analysis.**

| Gene                    | Sense primer (5'-3')                 | Antisense primer (3'-5')          |
|-------------------------|--------------------------------------|-----------------------------------|
| <b>Reference genes</b>  |                                      |                                   |
| <i>ATP5B</i>            | TCACCCAGGCTGGTTCAGA                  | AGTGGCCAGGGTAGGCTGA<br>T          |
| <i>B2M</i>              | CTGTGCTCGCGCTACTCTCT<br>CTT          | TGAGTAAACCTGAATCTTTG<br>GAGTACGC  |
| <i>ACTB</i>             | AAGCCACCCCACTTCTCTCT<br>AA           | AATGCTATCACCTCCCCTGT<br>GT        |
| <i>PPIA</i>             | CATCTGCACTGCCAAGACTG<br>A            | TTCATGCCTTCTTTCACTTTG<br>C        |
| <i>RPL13A_1</i>         | CCTGGAGGAGAAGAGGAAA<br>GAGA          | TTGAGGACCTCTGTGTATTT<br>GTCAA     |
| <i>RPL13A_2</i>         | AAGGTGGTGGTCGTACGCT<br>GTG           | CGGGAAGGGTTGGTGTTCAT<br>CC        |
| <b>Target genes</b>     |                                      |                                   |
| <i>BNIP3</i>            | AGCGCCCGGGATGCA                      | CCCGTTCCCATTATTGCTGA<br>A         |
| <i>BNIP3L</i>           | CTGCGAGGAAAATGAGCAGT<br>CTCT         | GCCCCCATT TTTTCCCATTG             |
| <i>Citrate synthase</i> | GATGTGTCAGATGAGAAGTT<br>ACGAGACT     | TGGCCATAGCCTGGAACAA               |
| <i>COXII</i>            | ACCTGCGACTCCTTGACGTT                 | GGGGGCTTCAATCGGGAGT<br>A          |
| <i>CYC1</i>             | GAGCACGACCATCGAAAACG                 | CGATATGCCAGCTTCCGACT              |
| <i>DNM1L</i>            | CGACTCATTAAATCATATTTT<br>CTCATTGTCAG | TGCATTACTGCCTTTGGCAC<br>ACT       |
| <i>ESRRA</i>            | TGCTGCTCACGCTACCGCTC                 | TCGAGCATCTCCAAGAACAG<br>C         |
| <i>FIS1</i>             | CCTGGTGCGGAGCAAGTAC<br>AA            | TCCTTGCTCCCTTTGGGCAG              |
| <i>FUNDC1</i>           | GAAACGAGCGAACAAAGCA<br>G             | GCAAAAAGCCTCCCACAAAT              |
| <i>GABARPL1</i>         | ATCGGAAAAAGGAAGGAGAA<br>AAGATC       | CAGGCACCCTGGCTTTTGG               |
| <i>HADHA</i>            | TGGCTTCCCGCCTTGTC                    | TGGAGCCGGTCCACTATCTT<br>C         |
| <i>HK2</i>              | GTAAATACAGTGGATCTCAA<br>TCTTCGGG     | CAAGGATTTGAGATGATTG<br>CTATTCA    |
| <i>KRT8</i>             | TCCTCAGGCAGCTATATGAA<br>GAG          | GGTTGGCAATATCCTCGTAC<br>TGT       |
| <i>MAP1LC3A</i>         | CCTGGACAAGACCAAGTTTT<br>TG           | GTCTTTCTCCTGCTCGTAGA<br>TG        |
| <i>MAP1LC3B</i>         | ACCATGCCGTCGGAGAAGA<br>C             | TCTCGAATAAGTCGGACATC<br>TTCTACTCT |
| <i>MFN1</i>             | CTGAGGATGATTGTTAGCTC<br>CACG         | CAGGCGAGCAAAAGTGGTA<br>GC         |

| <i>MFN2</i>          | TGGACCACCAAGGCCAAGG<br>A          | TCTCGCTGGCATGCTCCAC               |
|----------------------|-----------------------------------|-----------------------------------|
| <i>Mt-CytB</i>       | ACCCCCTAGGAATCACCTCC              | GCCTAGGAGGTCTGGTGAG<br>A          |
| <i>NDUFB3</i>        | TCAGATTGCTGTCAGACATG<br>G         | TGGTGTCCCTTCTATCTTCC<br>A         |
| <i>NRF1</i>          | AGGAACACGGAGTGACCCA<br>A          | TATGCTCGGTGTAAGTAGCC<br>A         |
| <i>OPA1</i>          | TACCAAAGGCATTTTGTAGA<br>TTCTGAGTT | GCATGCGCTGTATACGCCAA              |
| <i>PIGR</i>          | CTCTCTGGAGGACCACCGT               | CAGCCGTGACATTCCCTG                |
| <i>PINK1</i>         | GAAAGCCGCAGCTACCAAGA              | AGCACATTTGCGGCTACTCG              |
| <i>PPARGC<br/>1A</i> | AAGCCACTACAGACACCGC               | TCGTAGCTGTCATACCTGGG              |
| <i>PPARGC<br/>1B</i> | GGCGCTTTGAAGTGTTTGGT<br>GA        | TGATGAAGCCGTAATTCTCG<br>CCT       |
| <i>PPRC1</i>         | GCCCTTTGATCTCTGCTTTG<br>GG        | AAGTCTTCCCGGTTGGAGTC<br>AAG       |
| <i>PRKN</i>          | GGTTTGCCTTCTGCCGGGAA<br>TG        | CTTTCATCGACTCTGTAGGC<br>CTG       |
| <i>SDHB</i>          | TGGGGCCTGCAGTTCTTATG              | ATGGTGTGGCAGCGGTATAG              |
| Gene                 | Sense primer (5'-3')              | Antisense primer (3'-5')          |
| <b>Target genes</b>  |                                   |                                   |
| <i>SOD1</i>          | GGTCCTCACTTTAATCCTCTA<br>T        | CATCTTTGTCAGCAGTCACA<br>TT        |
| <i>SOD2</i>          | TGGACAAACCTCAGCCCTAA<br>CG        | TGATGGCTTCCAGCAACTCC<br>C         |
| <i>SQSTM1</i>        | GGTGCACCCCAATGTGATCT              | CGCAGACGCTACACAAGTCG              |
| <i>TFAM</i>          | GAAAGATTCCAAGAAGCTAA<br>GGGTGATT  | TCCAGTTTTCTTTACAGTCT<br>TCAGCTTTT |
| <i>TP63</i>          | CCACCTGGACGTATTCCACT<br>G         | TCGAATCAAATGACTAGGAG<br>GGG       |

**Abbreviations:**

*ATP5B*: ATP synthase F1 subunit beta, *B2M*: beta-2 microglobulin, *ACTB*: actin B, *PPIA*: peptidylprolyl isomerase A, *RPL13A*: Ribosomal Protein L13A, *BNIP3*: BCL2 interacting protein 3, *BNIP3L*: BCL2 interacting protein 3-like, Citrate synthase, *COXII*: Cytochrome c oxidase subunit II, *CYC1*: cytochrome c-1, *DNM1L*: dynamin 1-like, *ESRRA*: estrogen related receptor, alpha, *FIS1*: fission, mitochondrial 1, *FUNDC1*: FUN14 domain containing 1, *GABARAPL1*: GABA type A receptor associated protein like 1, *HADHA*: hydroxyacyl-CoA dehydrogenase trifunctional

multienzyme complex subunit alpha, *HK2*: hexokinase 2, *KRT8*: Keratin 8, *MAP1LC3A*: microtubule-associated protein 1 light chain 3 alpha, *MAP1LC3B*: microtubule-associated protein 1 light chain 3 beta, *MFN1*: mitofusin 1, *MFN2*: mitofusin 2, *Mt-CytB*: Mitochondrial-encoded Cytochrome Beta, *NDUFB3*: NADH:ubiquinone oxidoreductase subunit B3, *NRF1*: nuclear respiratory factor 1, *OPA1*: OPA1, mitochondrial dynamin like GTPase, *PIGR*: Polymeric Immunoglobulin Receptor, *PINK1*: PTEN Induced Kinase 1, *PPARGC1A*: PPARG coactivator 1 alpha, *PPARGC1B*: PPARG coactivator 1 beta, *PPRC1*: PPARG related coactivator 1, *PRKN*: Parkin RBR E3 Ubiquitin Protein Ligase, *SDHB*: succinate dehydrogenase complex iron sulfur subunit B, *SOD1*: superoxide dismutase 1, *SOD2*: superoxide dismutase 2, *SQSTM1*: sequestosome 1, *TFAM*: transcription factor A, mitochondrial, *TP63*: tumor protein 63

**Table S2. Antibodies used for western blotting**

| Target                        | RRID        | Company                   | Product number  | Dilution factor |
|-------------------------------|-------------|---------------------------|-----------------|-----------------|
| <b>Primary Antibodies</b>     |             |                           |                 |                 |
| BNIP3                         | AB_2259284  | Cell Signaling Technology | Cat# 3769S      | 1:1000          |
| BNIP3L                        | AB_2688036  | Cell Signaling Technology | Cat# 12396      | 1:1000          |
| DNM1L                         | AB_10950498 | Cell Signaling Technology | Cat# 8570       | 1:1000          |
| ESRRA                         | AB_1523580  | Abcam                     | Cat# ab76228    | 1:1000          |
| FUNDC1                        | AB_10609242 | Santa Cruz Biotechnology  | Cat# sc-133597  | 1:500           |
| GABARAPL1                     | AB_2294415  | Proteintech Group         | Cat# 11010-1-AP | 1:1000          |
| HK2                           | AB_2232946  | Cell Signaling Technology | Cat# 2867       | 1:1000          |
| MAP1LC3B                      | AB_915950   | Cell Signaling Technology | Cat# 2775       | 1:1000          |
| NRF1                          | AB_2154534  | Abcam                     | Cat# ab55744    | 1:1000          |
| OXPHOS                        | AB_2629281  | MitoScience LLC           | Cat# MS604      | 1:1000          |
| PINK1                         | AB_10127658 | Novus Biologicals         | Cat# BC100-494  | 1:2000          |
| PPARGC1A                      | AB_10697773 | Millipore                 | Cat# 516557     | 1:1000          |
| PRKN                          | AB_2159920  | Cell Signaling Technology | Cat# 4211       | 1:1000          |
| SQSTM1                        | AB_10624872 | Cell Signaling Technology | Cat# 5114       | 1:1000          |
| TFAM                          | AB_10682431 | Millipore                 | Cat# DR1071     | 1:1000          |
| <b>Secondary Antibodies</b>   |             |                           |                 |                 |
| Goat Anti-Mouse IgG Antibody  | AB_2827937  | Vector Laboratories       | Cat#BA-9200     | 1:10000         |
| Goat Anti-Rabbit IgG Antibody | AB_2313606  | Vector Laboratories       | Cat#BA-1000     | 1:10000         |

**Abbreviations:**

BNIP3: BCL2 Interacting Protein 3, BNIP3L: BCL2 Interacting Protein 3-Like, DNML1: dynamin 1-like, ESRRA: Estrogen Related Receptor, Alpha, FUNDC1: FUN14 Domain Containing 1, GABARAPL1: GABA Type A Receptor Associated Protein Like 1, HK2: Hexokinase 2, MAP1LC3B (or LC3B): Microtubule-Associated Protein 1 Light Chain 3 Beta, NRF1: Nuclear Respiratory Factor 1, OXPHOS: oxidative phosphorylation antibody cocktail (containing NDUFB8: NADH:Ubiquinone Oxidoreductase Subunit B8, SDHB: Succinate Dehydrogenase Complex Iron Sulfur Subunit B, UQCRC2: Ubiquinol-Cytochrome C Reductase Core Protein 2, MT-COI: Mitochondrially Encoded Cytochrome C Oxidase I, ATP5F1A: ATP Synthase F1 Subunit Alpha), PINK1: PTEN Induced Kinase 1, PPARGC1A: PPARG Coactivator 1 Alpha, PRKN: Parkin RBR E3 Ubiquitin Protein Ligase, SQSTM1: Sequestosome 1, TFAM: Transcription factor A, Mitochondrial
